# Supplementary material
Source: publisher site journal article supplement (https://www.dovepress.com/article/434917)
Supplement: Supplementary file 1 [file get_supplementary_file.php]

**Supporting information**

**Nano-photosensitizer directed targeted phototherapy effective against oral cancer in animal model**

Lina Yu1, #, *, Guanxiong Zhu1, #, Zeyu Zhang1 #, Zidan Xu1, Weijie Peng1, 2, Liting Zeng1, Yang Yu4, Siran Wang1, Zhongxiao Lin1, 2, 3, Xin Zhang3, Na Zhou3, Lingmin Zhang1, 2 *, Lu Liang1, 2 *

1Department of Preventive Dentistry, Affiliated Stomatology Hospital of Guangzhou Medical University, Guangdong Engineering Research Center of Oral Restoration and Reconstruction, Guangzhou Key Laboratory of Basic and Applied Research of Oral Regenerative Medicine, Guangzhou, 510182, PR China

2Guangzhou Municipal and Guangdong Provincial Key Laboratory of Molecular Target & Clinical Pharmacology, the State & NMPA Key Laboratory of Respiratory Disease, School of Pharmaceutical Sciences & The Fifth Affiliated Hospital, Guangzhou Medical University, Guangzhou, 511436, PR China

3State Key Laboratory of Quality Research in Chinese Medicine, Macau University of Science and Technology, Avenida Wailong, Taipa, Macau, PR China

4Department of Sports and Health, Guangzhou Sport University, Guangzhou, PR China

#These authors contributed equally to this work.

*Correspondence to: Lina Yu, Lingmin Zhang, and Lu Liang

E-mails: yulina@gzhmu.edu.cn, zhanglm@gzhmu.edu.cn and [lliangaa@gzhmu.edu.cn](mailto:lliangaa@gzhmu.edu.cn)


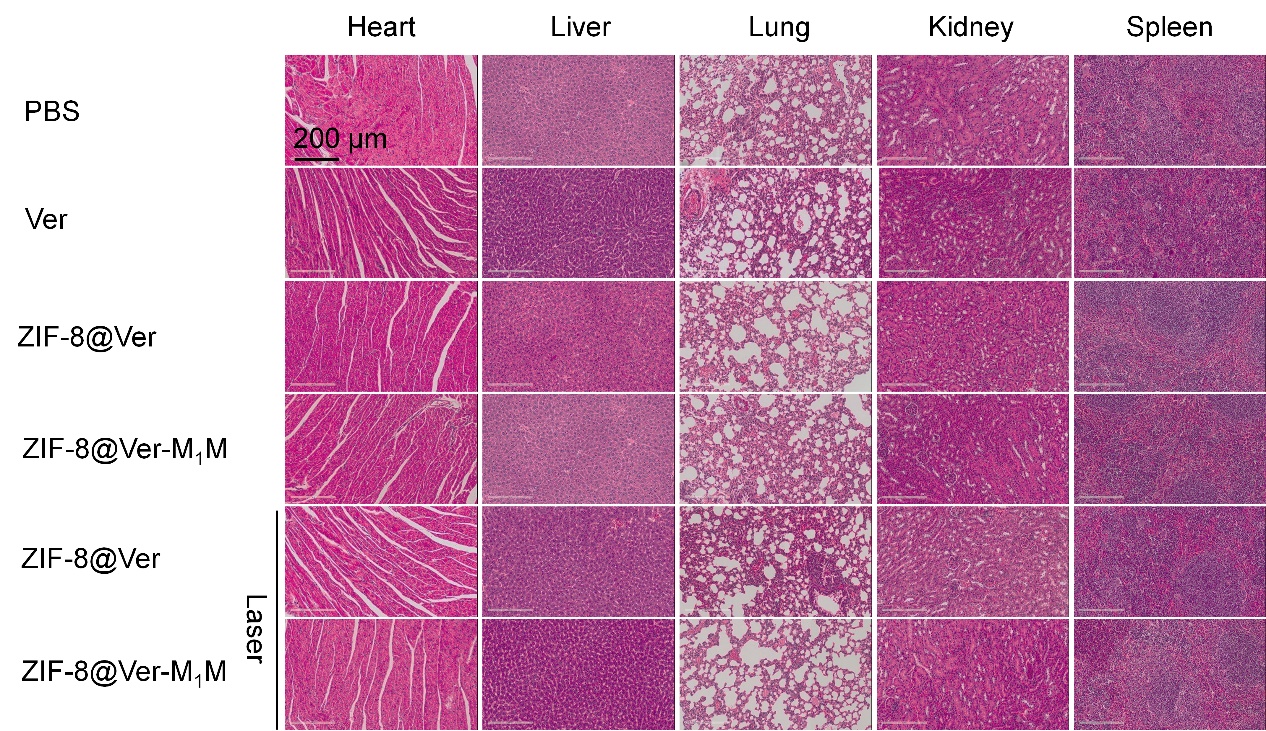


**Figure S1.** HE staining of major organs. The mice were administered at an equivalent dose of Ver (20 mg/kg) and sacrificed on Day 20. The major organs were extracted and stained with H&E.
